# Supplementary material for: Machine learning algorithms with body fluid parameters: an interpretable framework for malignant cell screening in cerebrospinal fluid
Source: publisher site journal article supplement (doi:10.1515/cclm-2025-0302), 2025-05-28
Supplement: Supplementary file 1 [file j_cclm-2025-0302_suppl_001.docx]

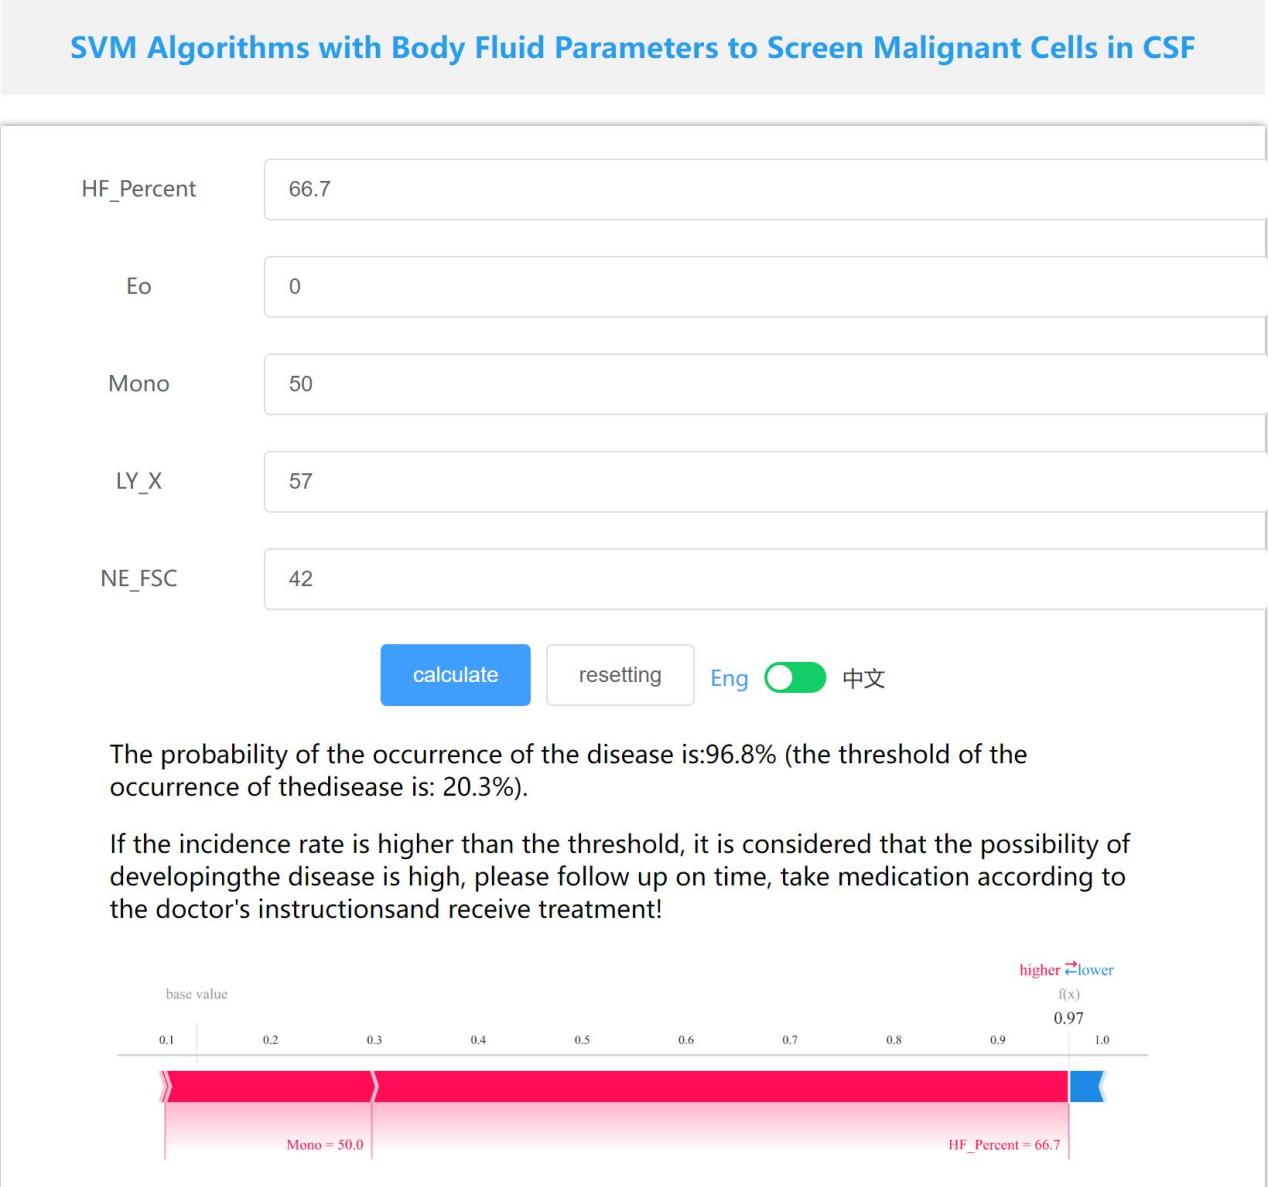


**Supplementary Figure 1** Convenient application for laboratory utility. The application of the final SVM model (with 5 selected features) provides cytological results prediction. When entering actual values, the system calculates and automatically displays a prediction probability of 96.8%. The application is available at: https://www.xsmartanalysis.com/model/list/predict/model/html?mid=24969&symbol=4174sa4892Po32zwoE02
